# Supplementary material for: Anti-Proliferative Effect of Statins Is Mediated by DNMT1 Inhibition and p21 Expression in OSCC Cells
Source: PubMed Central journal article supplement (PMC7463937; doi:10.3390/cancers12082084), 2020-07-28
Supplement: cancers-12-02084-s001.pdf [file cancers-12-02084-s001.pdf]

Figure S1. Cell Cycle Distribution Raw Data

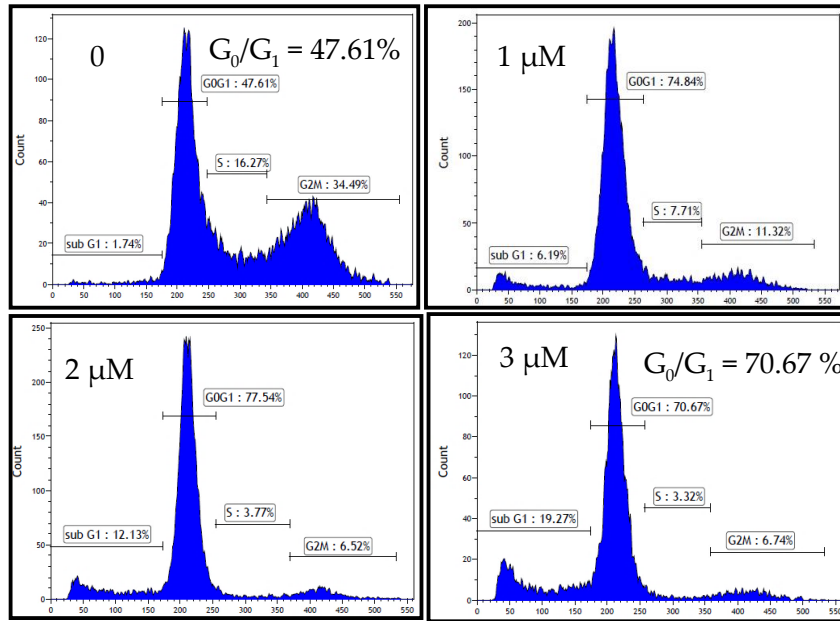

A. HSC-3, Cerivastatin 48 h

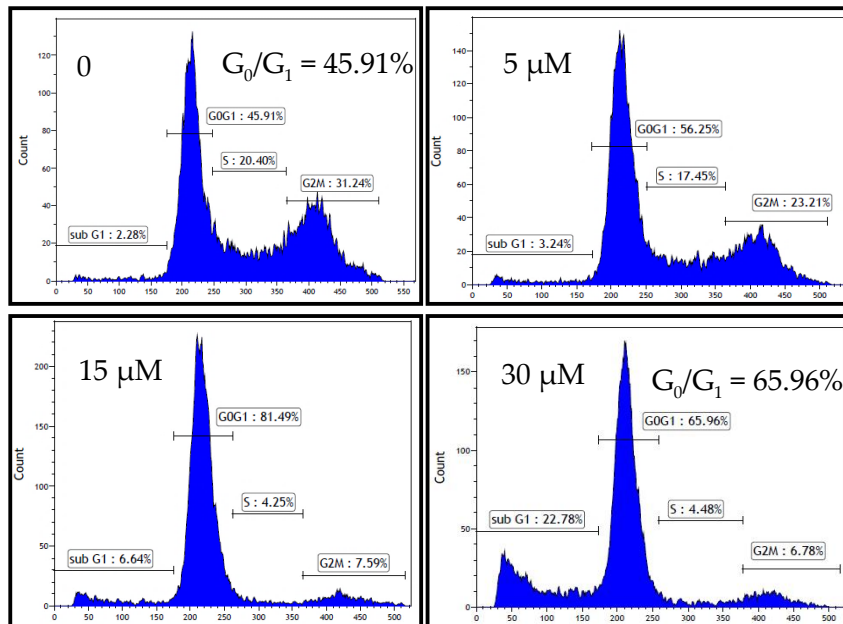

B. HSC-3, Simvastatin 48 h

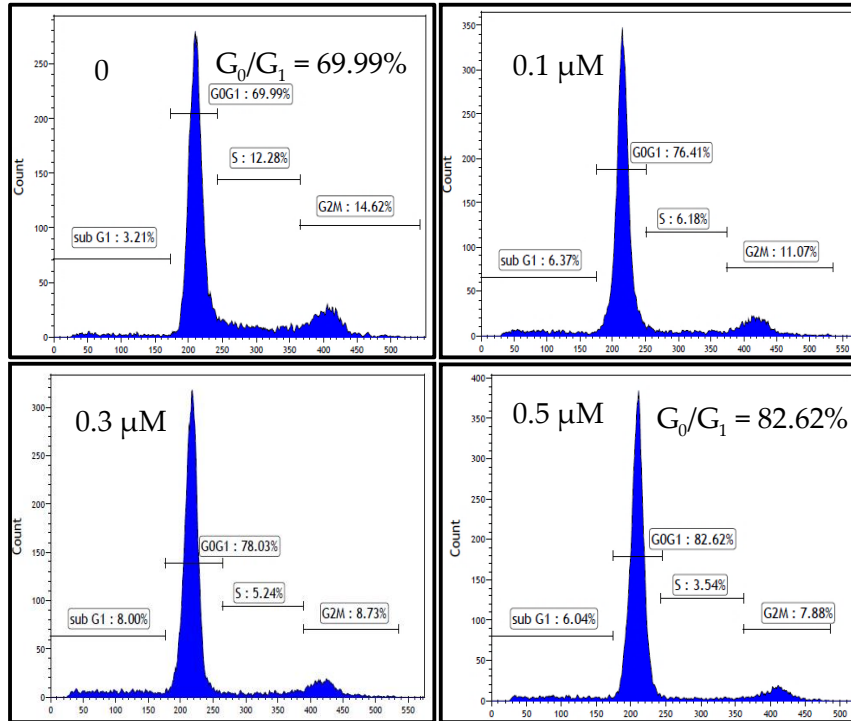

C. OECM-1, Cerivastatin 48 h

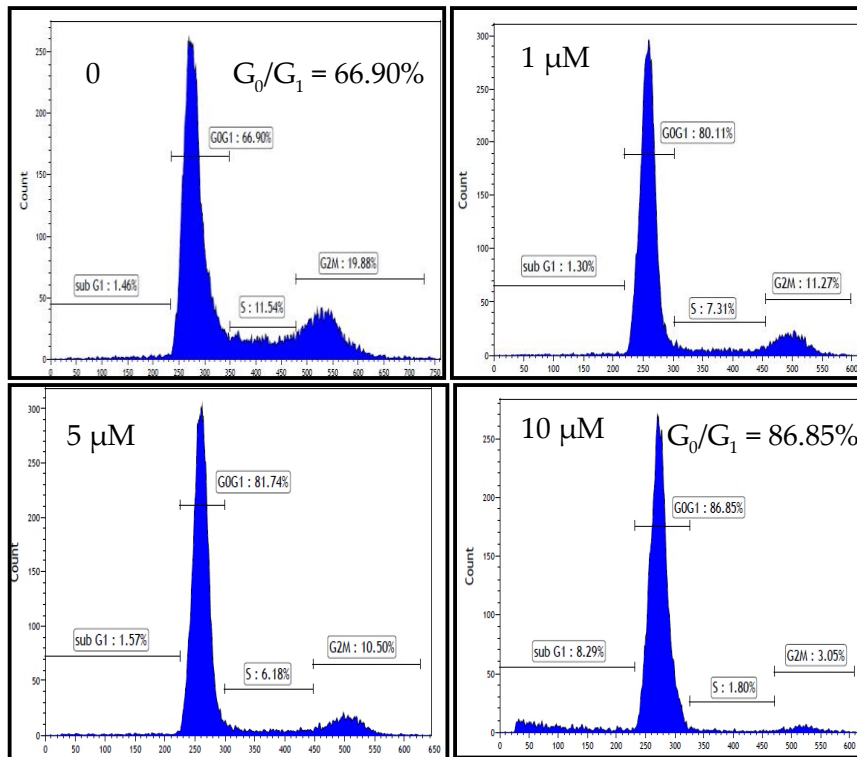

D. OECM-1, Simvastatin 48 h

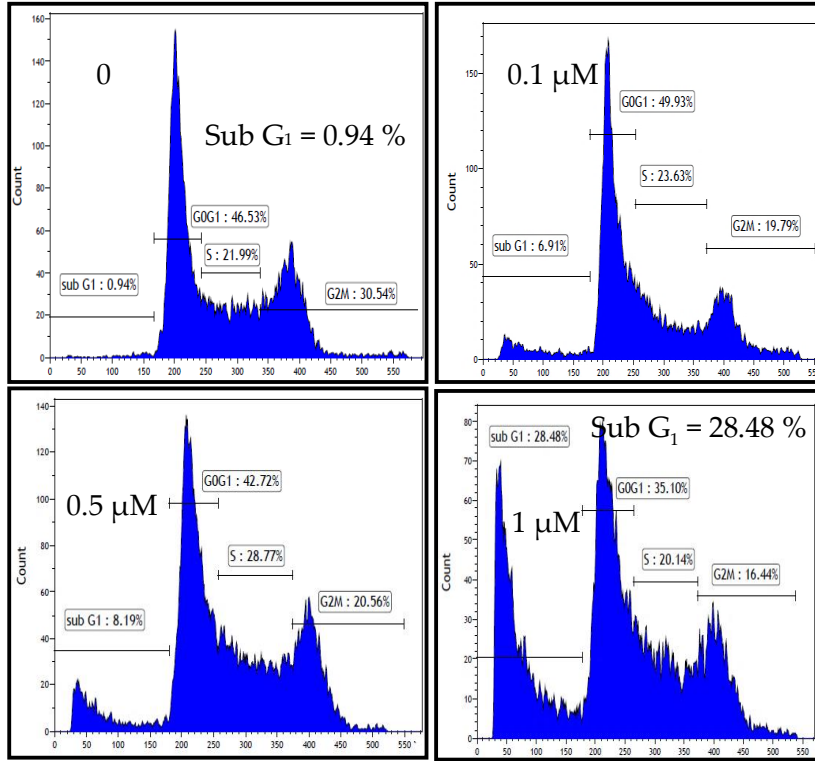

**E. SAS, Cerivastatin 48 h**

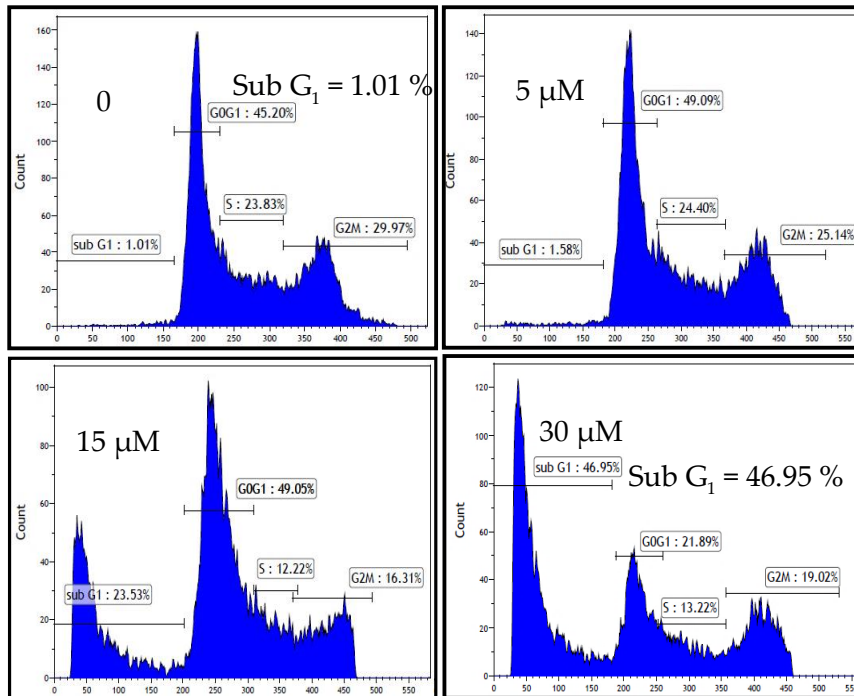

**F. SAS, Simvastatin 48 h**

**Figure S1. Cell cycle distribution raw data.** The percentages of cancer cells in the G<sub>2</sub>/M, S, G<sub>0</sub>/G<sub>1</sub>, and Sub G<sub>1</sub> phases were analyzed using flow cytometry as shown for HSC-3 (A-B), OECM-1 (C-D), and SAS (E-F).

Figure S2. Western Blotting Quantification of p21

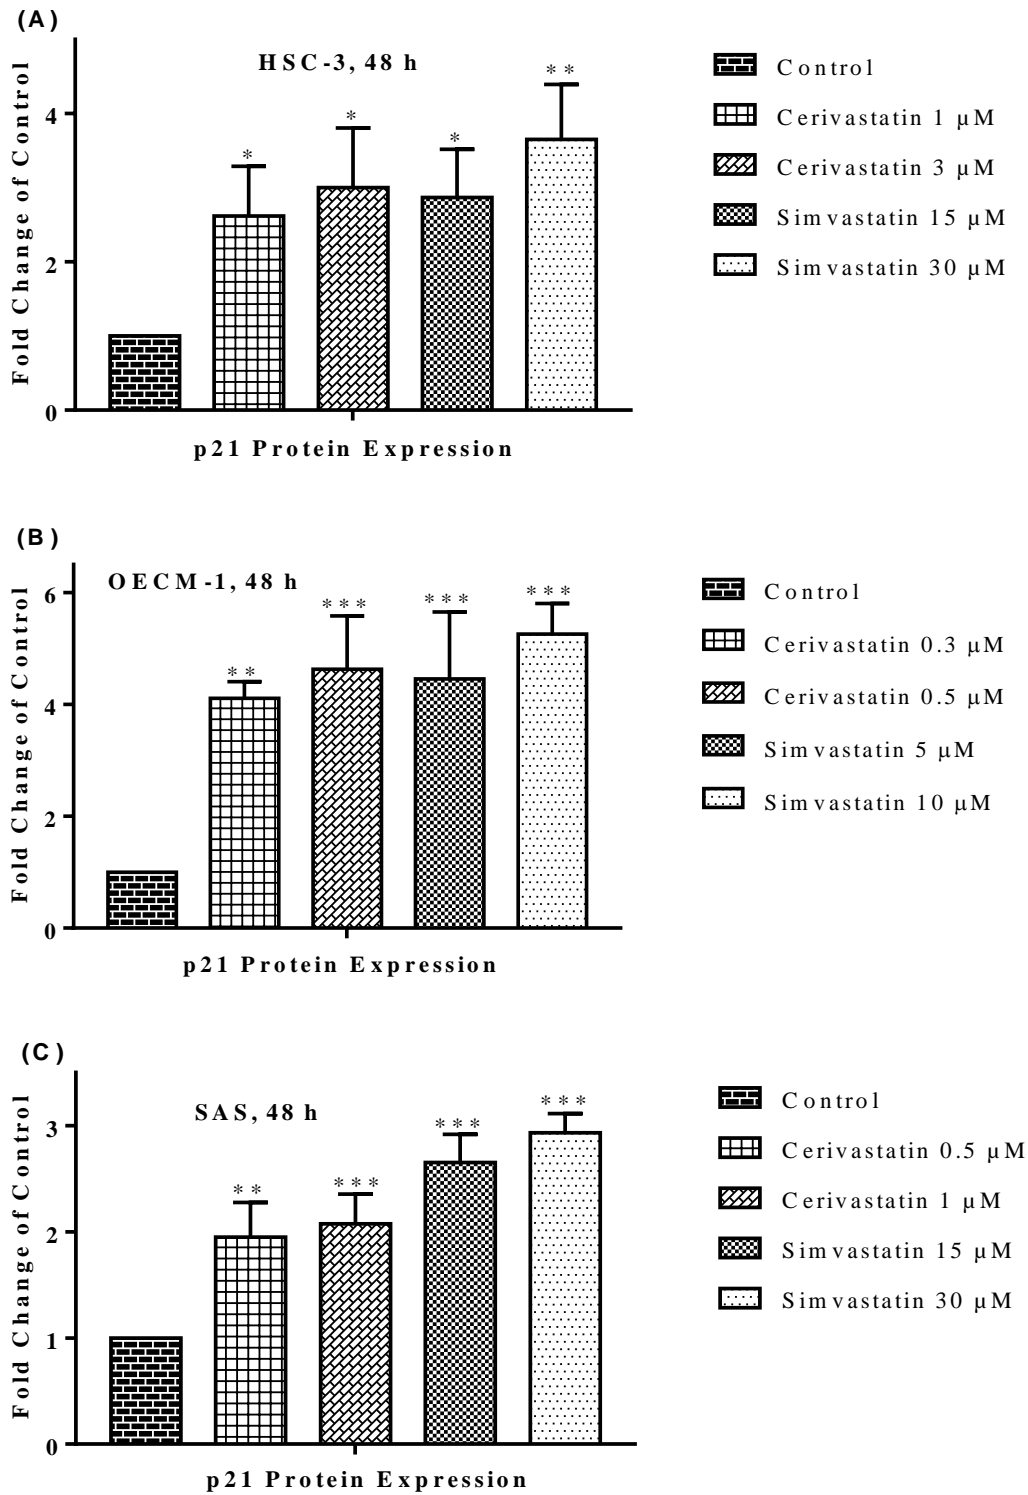

Figure S2. Western blotting quantification of p21. Protein expression of p21 was shown for HSC-3 (A), OECM-1 (B), and SAS (C). Error bars represent mean  $\pm$  SEM from at least 3 independent biological replicates. P values were determined using one-way ANOVA and Dunnett's multiple comparison test ( $P < 0.05$ ,  $**P < 0.01$ ,  $***P < 0.001$ ).

**Figure S3. Western Blotting Quantification of CDKs**

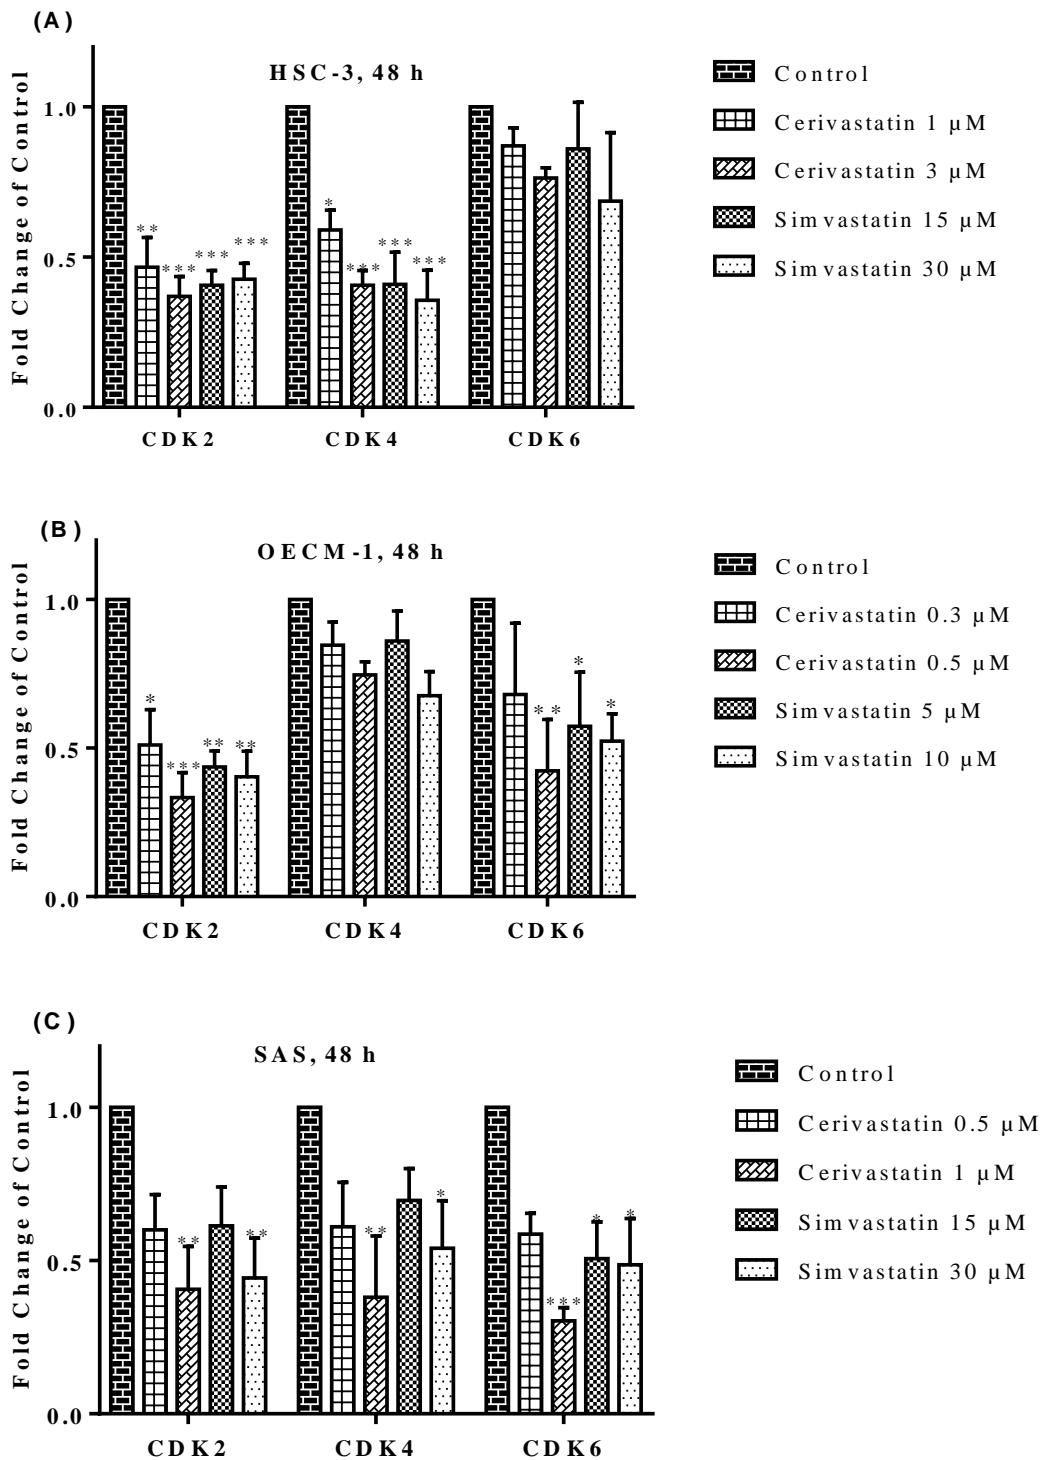

**Figure S3. Western blotting quantification of CDKs.** Protein expression of CDKs was shown for HSC-3 (A), OECM-1 (B), and SAS (C). Error bars represent mean  $\pm$  SEM from at least 3 independent biological replicates. *P* values were determined using two-way ANOVA and Dunnett's multiple comparison test (\**P* < 0.05, \*\**P* < 0.01, \*\*\**P* < 0.001).

**Figure S4. Western Blotting Quantification of DNMT1 and p21**

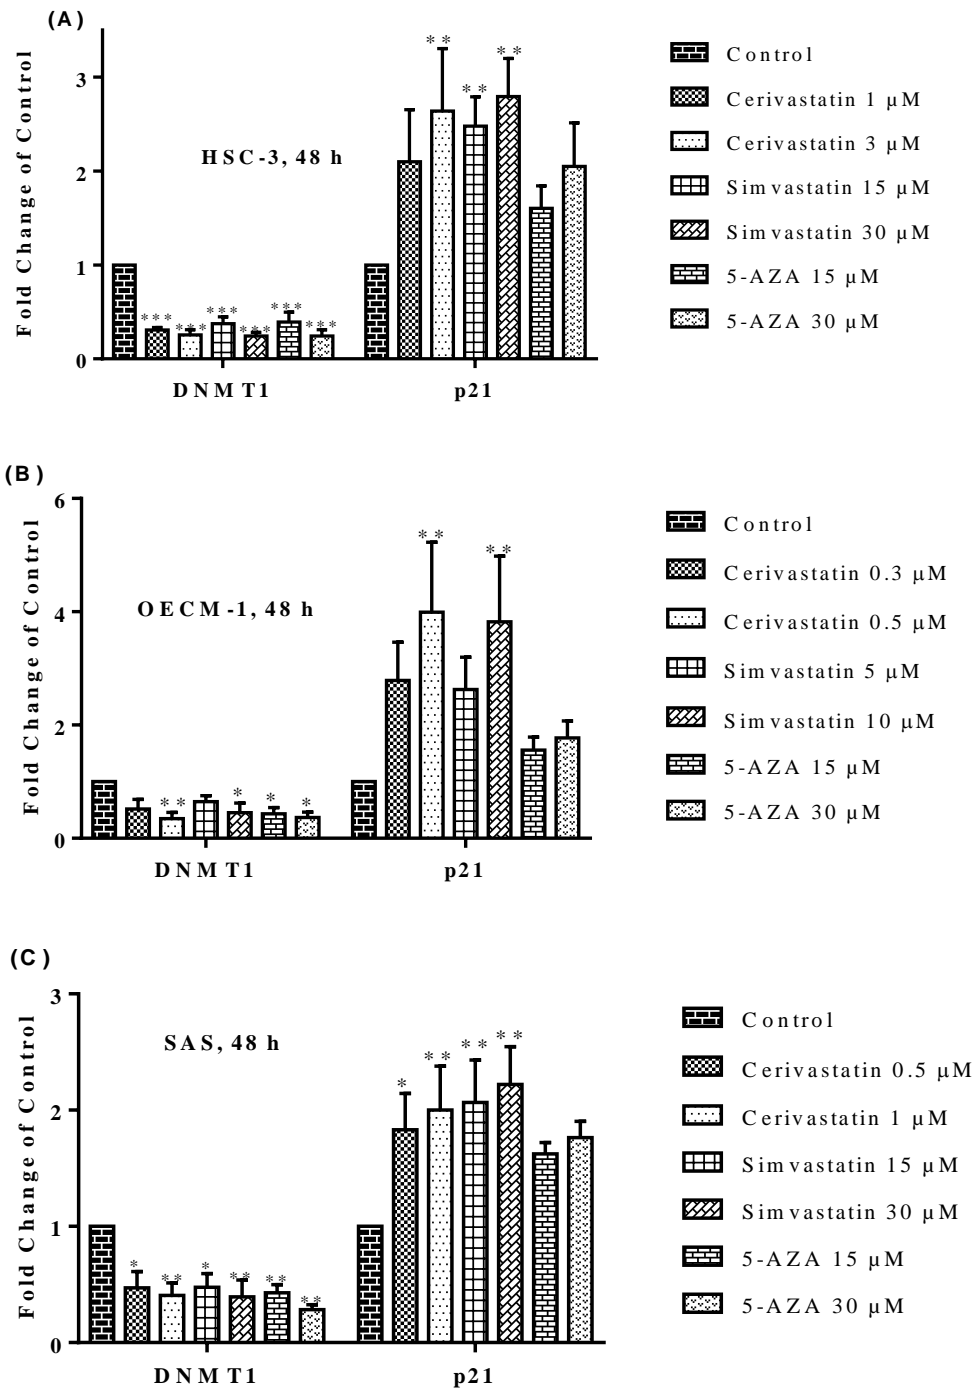

**Figure S4. Western blotting quantification of DNMT1 and p21.** The protein expression of DNMT1 and p21 was shown for HSC-3 (A), OECM-1 (B), and SAS (C). Error bars represent mean  $\pm$  SEM from at least 3 independent biological replicates. *P* values were determined using two-way ANOVA and Dunnett's multiple comparison test (\**P* < 0.05, \*\**P* < 0.01, \*\*\**P* < 0.001).

Figure S5. Original Images for Western Blotting

1. p21 (Figure 3)

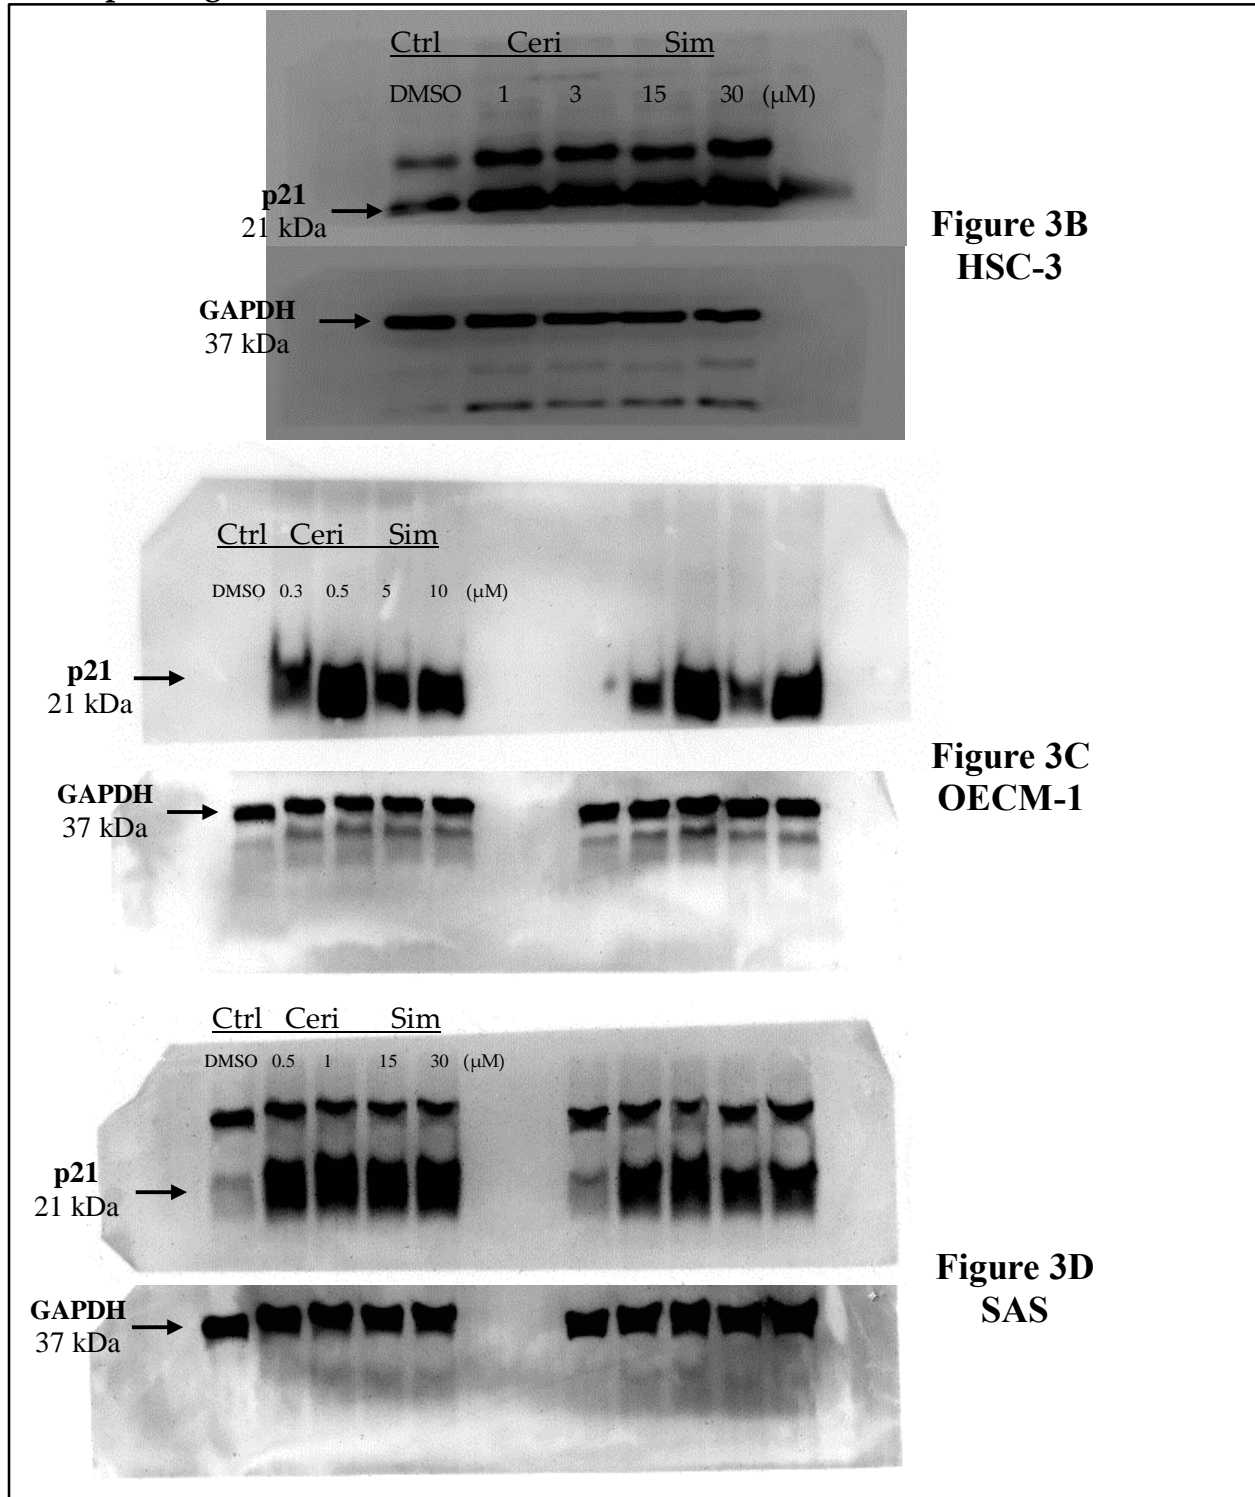

## 2. CDKs (Figure 4)

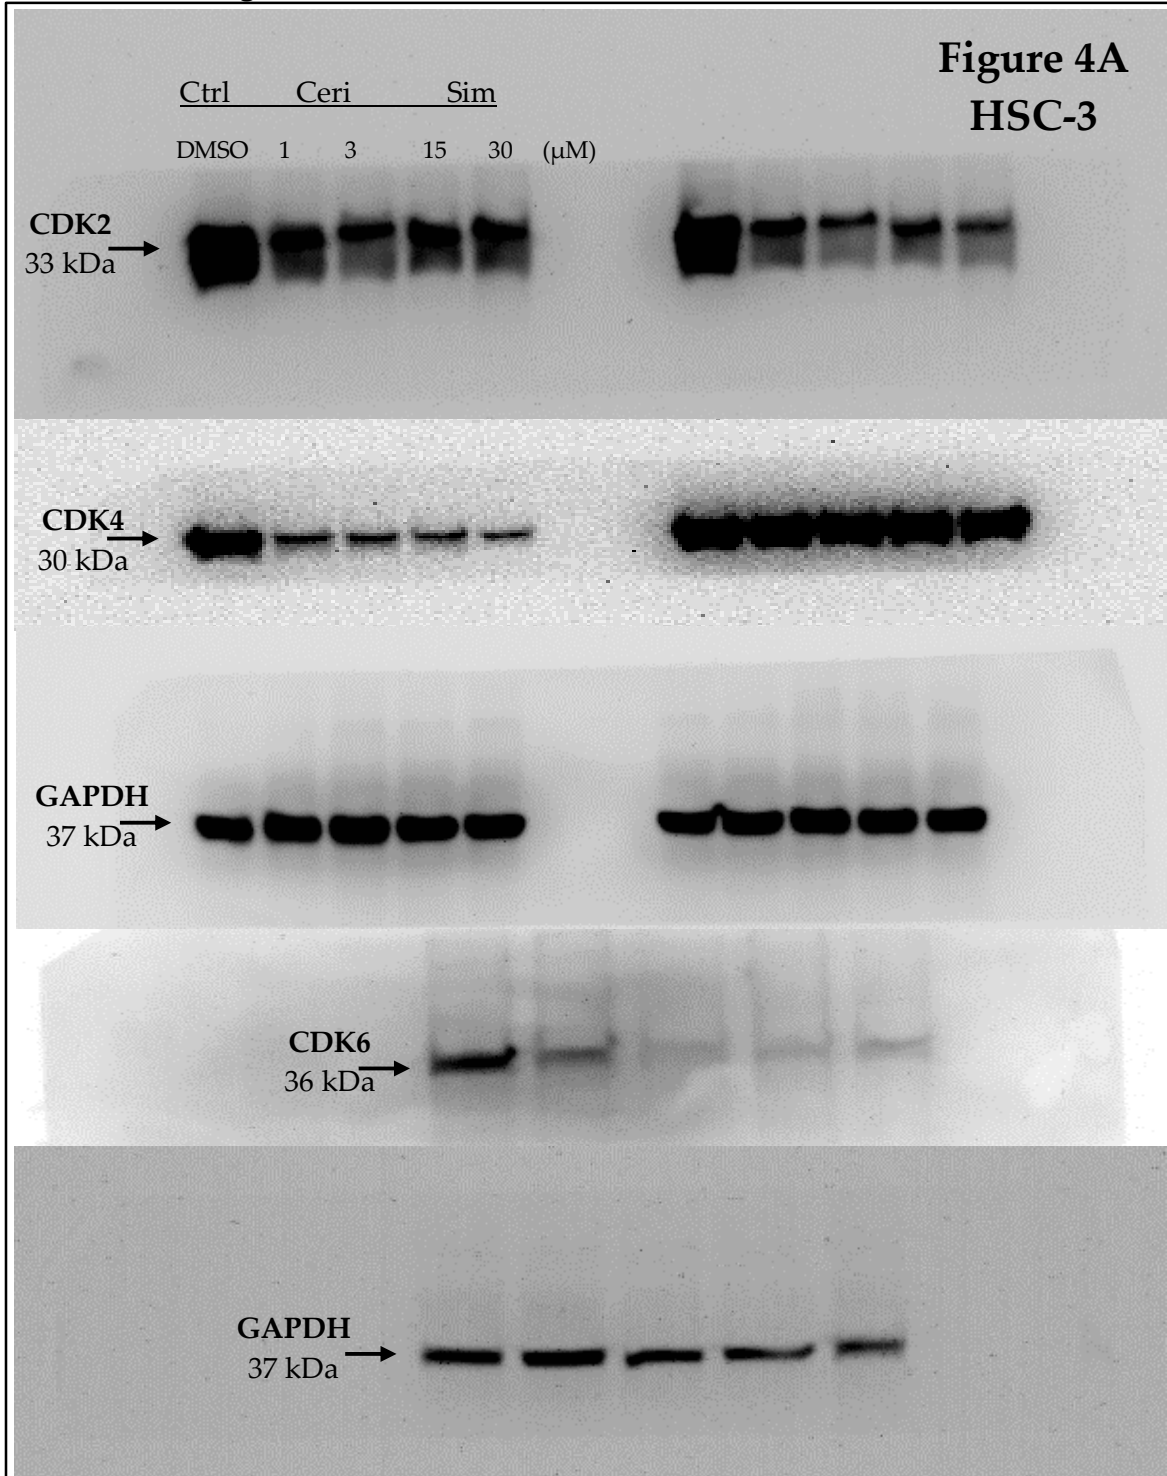



CDKs (Figure 4)...

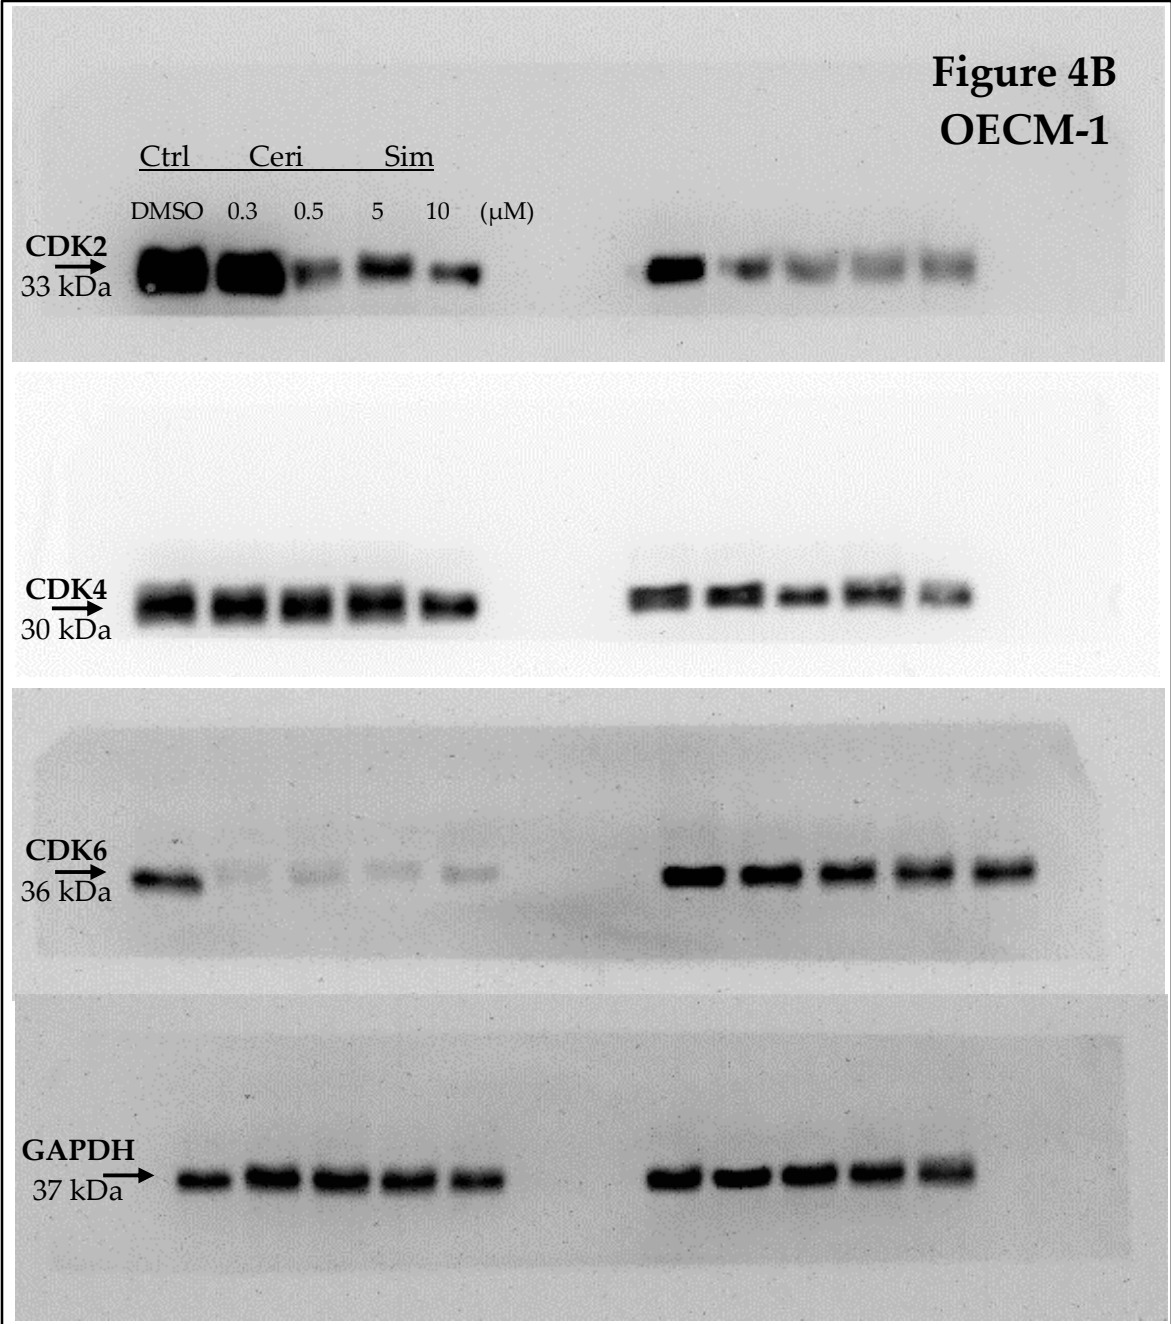

CDKs (Figure 4)...

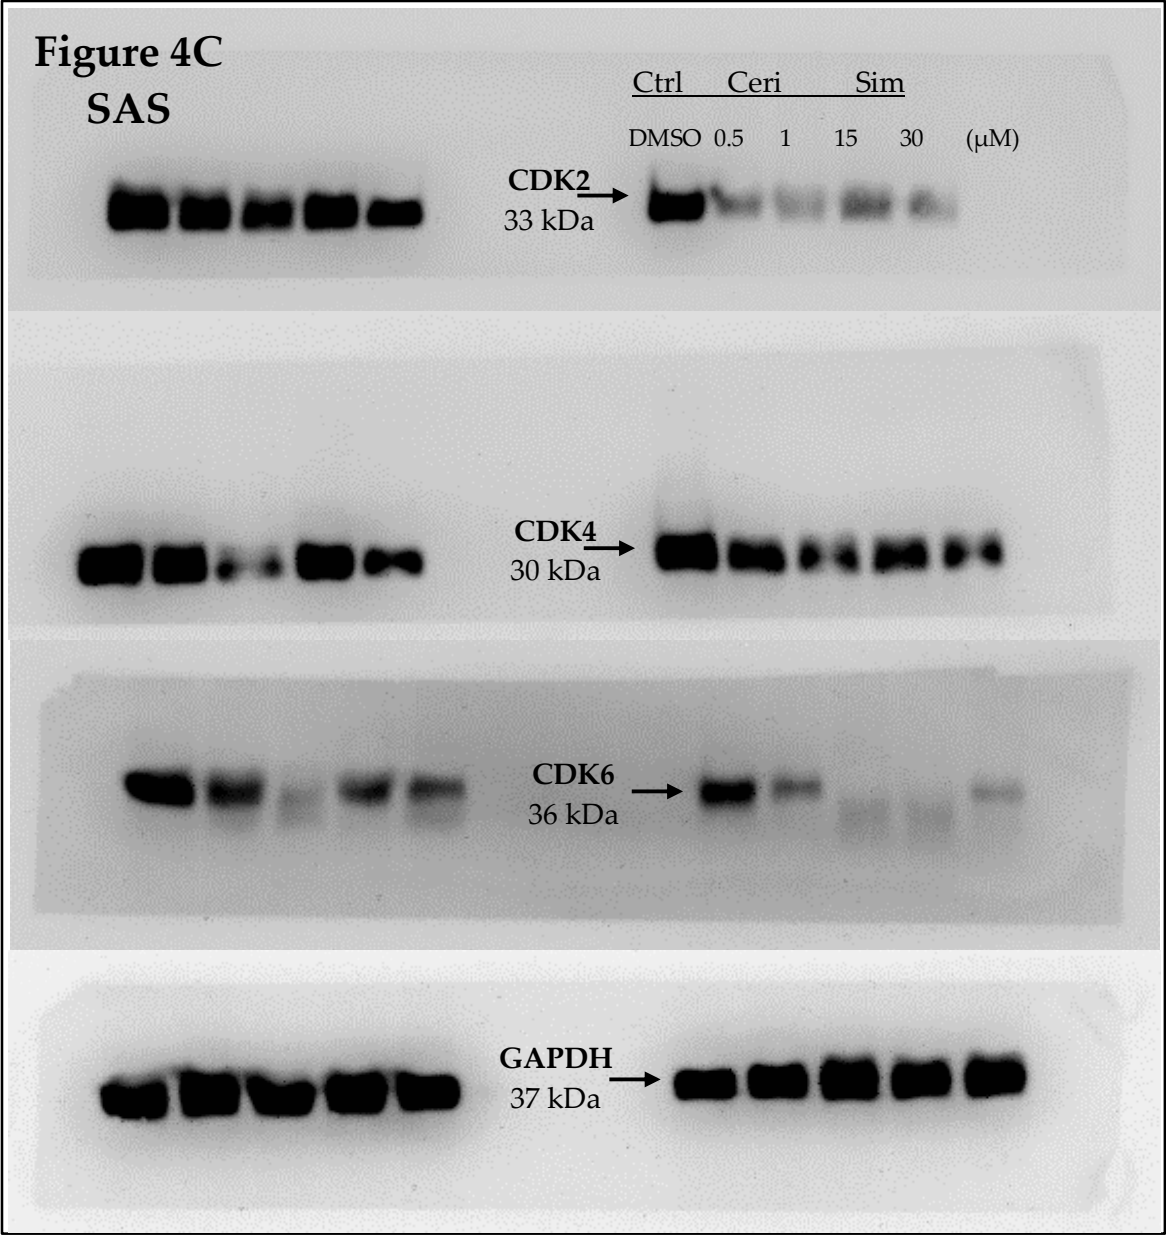

### 3. DNMT1 and p21 (Figure 5)

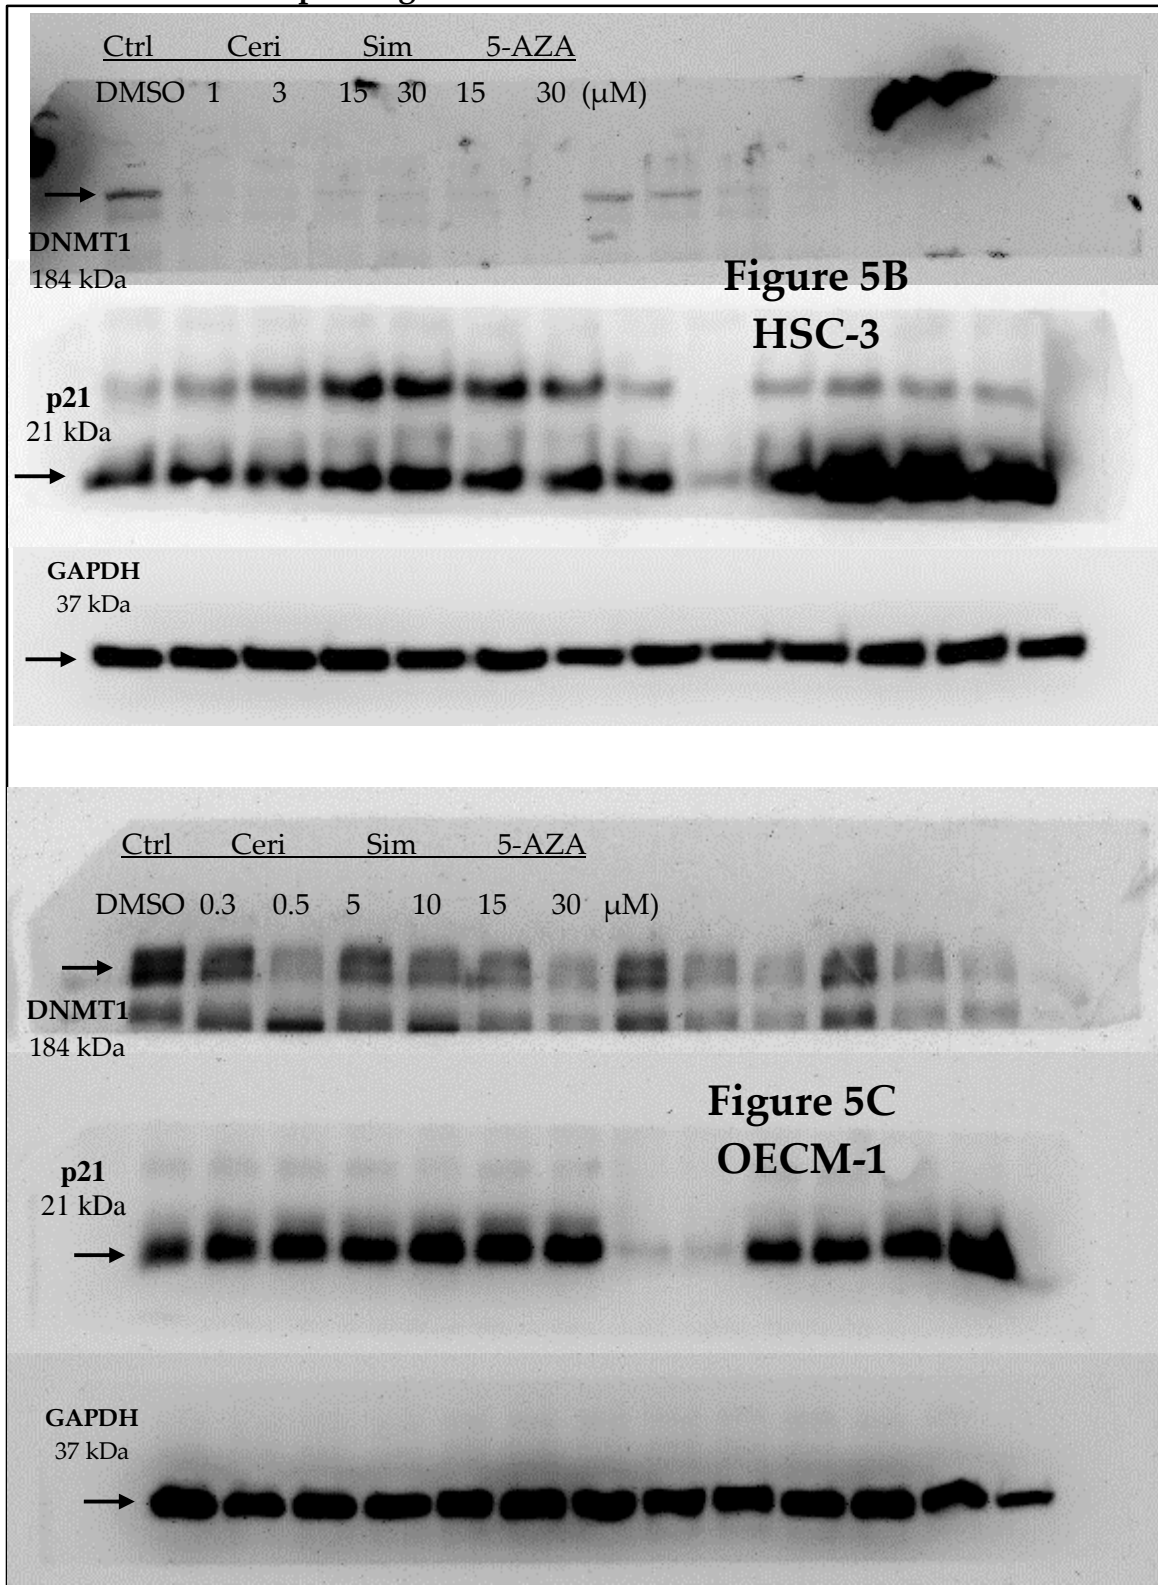

DNMT1 and p21 (Figure 5)...

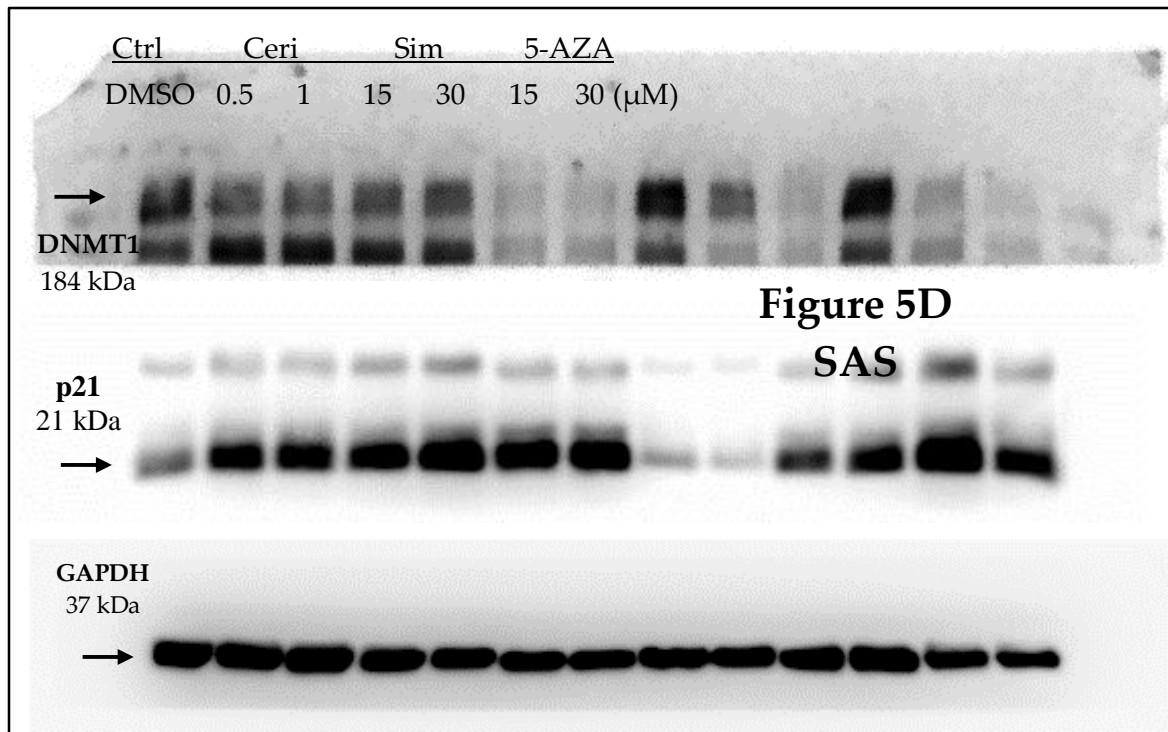

Figure S5. Original images for Western Blotting. The original images for Western blotting were shown for p21 (A), CDKs (B), and DNMT1-p21 (C).
